# Supplementary material for: Movie reconstruction from mouse visual cortex activity
Source: eLife. 2026 Mar 10;14:RP105081. doi: 10.7554/eLife.105081 (PMC12975128; doi:10.7554/eLife.105081)
Supplement: Figure 1—figure supplement 1—source data 1. [file elife-105081-fig1-figsupp1-data1.xlsx]

## Sheet: Figure 1-Figure Supplement 1A
		mouse 1 trial 7	mouse 4 trial 4	mouse 5 trial 3
	frame	motion energy	motion energy	motion energy
	31	nan	nan	nan
	32	10.7044	3.45983	1.21194
	33	11.5544	0.124582	1.64539
	34	11.6814	3.70115	1.39977
	35	12.2936	4.18162	1.16787
	36	14.5156	3.92643	0.0533462
	37	16.8225	4.54382	1.00999
	38	19.8344	0.180559	2.25129
	39	19.6545	4.33596	1.37301
	40	18.6968	4.83534	1.40722
	41	18.4871	4.38578	0.0620607
	42	18.1452	4.70241	1.22876
	43	19.044	0.222001	1.19937
	44	23.486	3.97746	1.19343
	45	28.6051	4.20922	1.11901
	46	25.0261	3.65831	0.0563714
	47	24.0645	3.39921	1.34233
	48	23.2939	0.173384	1.53113
	49	22.9215	2.62458	1.43272
	50	21.3337	2.81255	1.20755
	51	19.2108	1.94765	0.0685305
	52	18.4369	2.10505	1.1677
	53	15.624	0.118348	1.24396
	54	12.0924	1.08914	1.59302
	55	10.4408	1.043	1.00598
	56	9.66024	0.794652	0.0614536
	57	8.76968	0.525681	1.0915
	58	9.70347	0.0327544	0.976614
	59	10.1935	0.323406	1.00922
	60	11.2223	0.567136	1.38095
	61	11.2208	0.155846	0.0989264
	62	12.41	0.37884	1.04989
	63	12.891	0.0387596	1.7784
	64	12.4396	0.407217	1.64048
	65	11.1878	0.600357	1.68286
	66	12.6485	0.355736	0.124833
	67	11.2903	0.474399	1.31926
	68	10.4943	0.0356626	1.17877
	69	10.6598	0.303749	1.30712
	70	10.6987	0.509687	1.35666
	71	10.8811	0.363044	0.469513
	72	9.67554	0.21739	1.14102
	73	10.7749	0.0572128	1.20138
	74	12.4867	0.0899085	1.07311
	75	14.8265	0.116457	1.15174
	76	19.4828	0.166116	0.101438
	77	25.7468	0.151528	1.14415
	78	28.8131	0.0141547	1.05724
	79	32.5965	0.0868029	1.01101
	80	34.2307	0.177582	1.08934
	81	32.655	0.603012	0.102385
	82	33.6332	0.84044	1.47202
	83	33.8276	0.0890411	1.43231
	84	34.0125	1.38432	1.28931
	85	30.7144	0.928339	1.36227
	86	34.3956	0.850851	0.134056
	87	31.1846	0.604298	1.81496
	88	24.9415	0.0593677	2.20541
	89	22.2882	0.640026	1.88105
	90	18.7124	0.844105	2.65536
	91	19.7746	0.581724	0.280751
	92	19.4546	0.0622571	1.78702
	93	20.9928	0.871152	2.14926
	94	24.855	0.766473	1.96991
	95	26.037	0.745036	1.61189
	96	22.878	0.950477	0.178738
	97	24.1658	0.114259	1.28896
	98	26.8174	0.349048	1.19063
	99	24.5308	0.763671	1.37121
	100	20.3723	0.450589	1.24438
	101	13.8517	0.462191	0.163197
	102	16.1235	0.0592948	1.05755
	103	14.0962	0.259947	1.83517
	104	10.7174	0.241365	1.54895
	105	6.85993	190.23	0.918296
	106	4.75598	24.205	0.11037
	107	4.97886	0.00674675	1.40348
	108	5.08051	0.0699663	1.37125
	109	5.33816	0.148387	1.52566
	110	4.11967	0.434594	0.959031
	111	3.42981	1.00995	0.125442
	112	5.38158	0.136458	1.12583
	113	4.8058	4.20832	1.11509
	114	3.77122	8.71496	1.03363
	115	3.72558	11.4905	1.02264
	116	3.73345	12.859	0.146821
	117	4.03056	1.54664	1.14035
	118	4.89004	11.7317	1.18127
	119	4.32197	14.0598	1.0028
	120	3.18434	14.2101	1.10393
	121	4.75329	14.5427	0.155278
	122	5.06502	1.87074	0.962415
	123	3.16603	11.6137	1.14851
	124	3.49924	12.6253	1.35389
	125	4.50229	11.5817	1.3928
	126	6.66622	10.8207	0.207609
	127	5.84759	1.49642	1.29964
	128	4.19307	9.13821	1.61575
	129	4.81369	11.2169	1.67611
	130	3.46717	13.5792	1.35295
	131	5.56036	15.6675	0.198139
	132	3.28011	2.55298	0.976457
	133	4.64374	16.7279	1.25689
	134	4.54517	16.4928	1.65024
	135	3.15881	12.5301	1.65235
	136	2.52208	10.5634	0.275978
	137	2.46603	1.92767	1.06926
	138	2.70011	10.6143	0.793008
	139	2.52531	10.9882	1.18876
	140	2.51651	16.1842	1.62268
	141	2.02504	18.1998	0.287691
	142	1.8983	2.94171	0.952412
	143	2.93903	16.6936	0.812226
	144	4.77034	19.292	0.838324
	145	2.97745	17.8459	0.995332
	146	3.45476	14.9109	0.191195
	147	1.6597	2.57475	1.22705
	148	1.76347	10.0146	1.17938
	149	1.24162	9.95426	1.36988
	150	1.65484	6.99123	1.27782
	151	2.56189	4.63684	0.235381
	152	2.2672	0.700347	1.18274
	153	3.24358	3.02993	1.38756
	154	3.81722	4.19921	1.45397
	155	3.73452	3.15918	0.995272
	156	2.35154	3.27407	0.197952
	157	3.243	0.589794	1.11188
	158	3.33567	2.29587	1.56445
	159	1.99081	2.78084	1.68333
	160	4.12841	2.25166	1.76114
	161	3.72864	2.50099	0.343777
	162	2.89003	0.459621	1.61937
	163	1.22538	2.26104	2.07366
	164	1.97153	3.90707	2.03556
	165	58.9976	3.14125	1.27537
	166	12.7793	3.00504	0.244631
	167	2.41231	0.56809	1.19992
	168	1.6976	2.58426	1.20589
	169	0.953541	2.882	1.45021
	170	1.24664	2.67929	1.14467
	171	3.6937	4.13502	0.245144
	172	1.27074	0.847449	1.22682
	173	2.05911	2.61021	1.15339
	174	2.21914	2.83764	0.869107
	175	0.98132	2.67627	1.15399
	176	0.794339	2.5774	0.271458
	177	0.897577	0.52643	1.17822
	178	1.39685	1.99921	0.804214
	179	0.99662	2.72453	1.29061
	180	1.18643	3.22189	1.06021
	181	0.839554	3.628	0.259644
	182	2.2682	0.752138	1.69902
	183	1.99498	2.98432	1.48143
	184	3.93444	3.62677	1.67499
	185	3.81991	2.69761	1.66207
	186	5.91893	3.00529	0.372119
	187	9.56309	0.657509	1.39229
	188	4.53122	1.90556	1.9104
	189	3.46906	2.21027	1.18599
	190	3.8238	1.55487	1.0177
	191	3.04726	2.17083	0.273387
	192	3.88555	0.502973	59.8712
	193	2.56194	1.51018	16.5546
	194	2.52301	2.13772	1.43661
	195	2.15669	1.88089	1.40596
	196	1.18163	1.78981	0.33719
	197	0.727456	0.396797	1.47604
	198	7.12168	1.30157	1.63596
	199	7.34068	2.14649	1.31384
	200	6.55558	1.05579	1.55348
	201	2.07018	1.66603	0.375733
	202	0.682808	0.436144	1.77201
	203	1.13406	0.815291	1.30924
	204	4.17703	1.49261	1.29031
	205	3.72405	1.19282	2.08967
	206	1.50435	1.56242	0.554431
	207	1.76655	0.419319	1.48279
	208	0.811827	0.773952	1.22466
	209	1.88754	1.1626	1.44318
	210	3.19414	1.06566	2.12951
	211	2.23736	1.43828	0.555183
	212	1.48289	0.40391	1.30639
	213	7.54197	0.960886	1.12003
	214	8.05032	1.16677	1.77153
	215	12.3952	1.26381	1.51867
	216	10.7096	1.47395	0.414348
	217	2.9499	0.387058	1.43307
	218	2.75337	0.872725	1.52474
	219	2.25241	1.00099	1.71344
	220	6.4021	0.927806	1.51617
	221	4.98549	0.869525	0.440424
	222	6.83335	0.211374	1.31028
	223	5.62383	0.732397	1.37338
	224	1.32791	0.715571	1.47772
	225	1.65326	0.889061	1.17431
	226	0.901747	0.873304	0.313832
	227	1.2466	0.242248	0.960675
	228	1.63258	0.889996	1.49396
	229	0.424553	0.950384	1.39709
	230	1.18256	1.00398	1.55768
	231	1.44059	1.01061	0.416713
	232	3.43672	0.26003	1.09779
	233	1.66184	1.16501	1.70231
	234	1.51062	1.24789	1.67087
	235	1.19531	1.21584	1.23452
	236	3.68079	1.83272	0.307281
	237	2.58129	0.542319	1.54334
	238	2.45144	1.49608	1.67709
	239	2.96509	1.49853	1.14156
	240	1.90401	1.86908	1.16506
	241	1.66499	1.96157	0.348556
	242	1.79503	0.533269	1.49731
	243	2.23753	2.13034	1.28675
	244	2.55815	1.75352	1.18807
	245	3.5983	2.61419	1.11077
	246	3.50809	1.96327	0.308397
	247	2.08173	0.442534	1.34247
	248	2.25989	2.121	1.55248
	249	3.0198	1.80324	1.24526
	250	2.58981	2.24599	1.29097
	251	2.15694	1.60755	0.395236
	252	2.13494	0.37775	1.6958
	253	2.15034	1.78165	1.15005
	254	2.07251	1.53476	1.05336
	255	2.6425	2.29633	0.317741
	256	2.063	1.96699	1.43645
	257	1.99456	0.501282	1.6637
	258	2.36314	1.73755	1.61077
	259	2.32567	1.4545	1.50504
	260	2.53004	1.80757	0.463942
	261	3.06846	1.92614	1.30425
	262	2.16006	0.550794	1.55151
	263	2.56492	2.16468	1.33619
	264	2.92854	1.61829	1.85809
	265	2.58055	1.42161	0.634607
	266	2.52305	46.1573	1.65723
	267	2.39628	18.5877	1.40634
	268	2.45394	0.254295	1.167
	269	0.728738	0.848033	1.53694
	270	1.86109	0.910904	0.574707
	271	2.63226	1.0591	1.28619
	272	2.42938	0.355482	1.25696
	273	2.39139	0.828063	1.06312
	274	2.18557	1.01223	1.10835
	275	2.4565	0.859148	0.433253
	276	2.26845	0.687207	0.994751
	277	2.34641	0.221329	0.797133
	278	2.62326	0.646184	1.29782
	279	10.0294	0.905866	1.07773
	280	3.57537	0.920873	0.393834
	281	2.49226	0.959038	1.00691
	282	6.59508	0.315534	1.48548
	283	5.49162	0.795425	1.42695
	284	5.32763	0.931645	1.14623
	285	5.98257	0.686397	0.536487
	286	5.60546	0.640568	0.908244
	287	5.07401	0.220133	1.87249
	288	4.65892	0.555945	1.18909
	289	4.0763	0.432766	1.15002
	290	2.43124	0.657555	0.448057
	291	2.00015	0.710534	0.564554
	292	1.89199	0.220475	1.18905
	293	2.53021	0.371612	1.43399
	294	2.23343	0.677642	1.13229
	295	2.14665	1.02961	0.376813
	296	3.83889	0.815597	0.836009
	297	2.90235	0.275103	1.07859
	298	2.83439	0.581425	0.929023
	299	2.27426	0.764413	0.883404
	300	2.74511	1.03016	0.362703

## Sheet: Figure 1-Figure Supplement1B
		mouse 1 trial 7		mouse 4 trial 4		mouse 5 trial 3
	frame	pupil diameter	running speed	pupil diameter	running speed	pupil diameter	running speed
	31	-0.626364	0	1.56712	0.714995	0.145034	0.00156435
	32	-0.607024	0	1.5826	0.736173	0.13094	0.00160808
	33	-0.586345	0	1.57085	0.753917	0.179977	0.00160615
	34	-0.588847	0	1.56464	0.726317	0.164194	0.0014483
	35	-0.604653	0	1.55781	0.67187	0.17607	0.000956004
	36	-0.63201	0	1.54893	0.62036	0.250888	0.000420051
	37	-0.619792	0	1.56839	0.616701	0.249426	3.93362e-05
	38	-0.599338	0	1.56405	0.641537	0.211058	0
	39	-0.572333	0	1.51647	0.668287	0.127799	0
	40	-0.604088	0	1.54772	0.712929	0.136821	0
	41	-0.604401	0	1.58983	0.768569	0.142886	0
	42	-0.576629	0	1.63325	0.819196	0.118251	1.54499e-06
	43	-0.591522	0	1.6048	0.804647	0.129934	0.000173579
	44	-0.599774	0	1.57468	0.751691	0.144107	0.000652339
	45	-0.601389	0	1.55608	0.696602	0.152848	0.00118545
	46	-0.570998	0	1.59862	0.636037	0.0848996	0.00156457
	47	-0.571182	0	1.63363	0.57204	0.0545622	0.00160808
	48	-0.599462	0	1.64555	0.513046	0.111723	0.00160634
	49	-0.569987	0	1.64343	0.514821	0.0732	0.00145016
	50	-0.553769	0	1.6449	0.552867	0.0723634	0.000969664
	51	-0.550384	0	1.65501	0.592376	0.167209	0.00041813
	52	-0.576379	0	1.63971	0.634587	0.152174	4.47801e-05
	53	-0.586078	0	1.63156	0.678178	0.104232	0
	54	-0.581092	0	1.64108	0.718048	0.0280572	0
	55	-0.607921	0	1.65641	0.712325	0.0626032	0
	56	-0.617814	0	1.66452	0.679233	0.0545719	0
	57	-0.611789	0	1.66	0.645298	-0.060354	0
	58	-0.60826	0	1.68486	0.609817	0.0275576	0
	59	-0.608011	0	1.67201	0.573639	0.104292	0
	60	-0.611779	0	1.59476	0.540769	0.108943	0
	61	-0.676291	0	1.60623	0.547867	0.034296	0
	62	-0.685157	0	1.64332	0.578979	0.0109052	0
	63	-0.643125	0	1.70399	0.610915	0.11202	0
	64	-0.677145	0	1.68983	0.642126	0.0573938	0
	65	-0.678652	0	1.65573	0.673266	0.0287481	0
	66	-0.650458	0	1.60481	0.700496	0.0868201	0
	67	-0.661429	0	1.65415	0.680943	0.0591174	0
	68	-0.673181	0	1.69814	0.635035	0.0350535	0
	69	-0.685156	0	1.71429	0.586498	0.0417697	0
	70	-0.662586	0	1.68434	0.512102	0.0701784	0
	71	-0.654559	0	1.69466	0.42202	0.0627739	0
	72	-0.660446	0	1.77556	0.334313	-0.0139484	0
	73	-0.683528	0	1.78899	0.279609	-0.0212375	0
	74	-0.686007	0	1.78594	0.244198	-0.00504825	0
	75	-0.669623	0	1.76967	0.214551	0.0353542	0
	76	-0.676493	0	1.75352	0.248707	-0.0270455	0
	77	-0.68435	0	1.7381	0.322389	-0.0487881	0
	78	-0.693774	0	1.72375	0.398846	0.0258176	0
	79	-0.741686	0	1.75964	0.485533	-0.00567296	0
	80	-0.749993	0	1.78319	0.576529	-0.0510418	0
	81	-0.722713	0	1.77665	0.664564	-0.0927501	0
	82	-0.766882	0	1.7644	0.710715	-0.0597515	0
	83	-0.76312	0	1.77153	0.731652	-0.0225859	0
	84	-0.715654	0	1.81022	0.749743	0.00276172	1.71451e-06
	85	-0.753508	0	1.82293	0.744383	0.000935806	0.00015756
	86	-0.785589	0	1.82985	0.724268	-0.0118611	0.000649477
	87	-0.810991	0	1.8326	0.704609	-0.0369192	0.00118809
	88	-0.761255	0	1.78597	0.693379	-0.00519082	0.00156478
	89	-0.763513	0	1.77606	0.68723	0.02243	0.00160808
	90	-0.81198	0	1.83673	0.681095	0.0286138	0.00160637
	91	-0.717857	0	1.84534	0.674333	-0.0135629	0.00144939
	92	-0.709726	0	1.84346	0.667229	-0.0390629	0.000965787
	93	-0.780523	0	1.83484	0.657967	-0.0214419	0.000421523
	94	-0.763664	1.40109e-05	1.83325	0.618627	-0.0576703	4.41871e-05
	95	-0.756637	0.000331195	1.82077	0.561791	-0.0828314	0
	96	-0.759464	0.000903325	1.79023	0.503248	-0.0732123	1.77288e-06
	97	-0.810283	0.00148046	1.84159	0.436772	-0.0125883	0.000156153
	98	-0.797402	0.00176406	1.88028	0.365618	0.00798575	0.000640428
	99	-0.727523	0.00177293	1.8816	0.2967	-0.0552119	0.00118899
	100	-0.75509	0.00175856	1.83873	0.266645	-0.0319711	0.00156316
	101	-0.777673	0.00144909	1.83833	0.259506	-0.0228881	0.00160808
	102	-0.795292	0.000868763	1.9123	0.254288	-0.062197	0.00160639
	103	-0.796556	0.000293007	1.85433	0.265383	-0.0267283	0.00144959
	104	-0.807429	1.00024e-05	1.81408	0.285985	0.00984159	0.000961254
	105	-0.82672	0	1.82868	0.307019	0.0280755	0.000420379
	106	-0.810607	0	1.89983	0.329235	0.0515012	4.44137e-05
	107	-0.80888	0	1.9106	0.352167	0.0546867	0
	108	-0.820476	0	1.81529	0.374025	0.0204429	0
	109	-0.802302	0	1.85428	0.384465	0.0229633	0
	110	-0.786232	0	1.88431	0.38788	0.0323759	0
	111	-0.772752	0	1.87377	0.389835	0.0440593	0
	112	-0.803546	0	1.89256	0.375361	0.0128601	0
	113	-0.828208	0	1.89326	0.351268	-0.0278783	0
	114	-0.847118	0	1.8603	0.328165	-0.0738811	0
	115	-0.869298	0	1.83525	0.321471	-0.0802547	0
	116	-0.874459	0	1.83246	0.324805	-0.0771774	0
	117	-0.863825	0	1.8644	0.329558	-0.0696166	0
	118	-0.869555	0	1.78619	0.348352	-0.0465131	0
	119	-0.88259	0	1.72372	0.37599	-0.0233882	0
	120	-0.902344	0	1.70655	0.403702	-0.00429853	0
	121	-0.915527	0	1.71978	0.430287	0.00220986	0
	122	-0.903029	0	1.7206	0.455687	0.00904745	0
	123	-0.867293	0	1.69578	0.480577	0.0197182	1.73936e-06
	124	-0.89491	0	1.71394	0.491262	0.000591091	0.000159704
	125	-0.904885	0	1.70803	0.493448	-0.0145902	0.000646921
	126	-0.899097	0	1.65558	0.493814	-0.0150171	0.00118761
	127	-0.952566	0	1.68006	0.475773	0.0541587	0.00156828
	128	-0.967899	0	1.70246	0.44721	0.092265	0.00160808
	129	-0.947713	0	1.70648	0.419895	0.0555536	0.0016065
	130	-0.92964	0	1.64178	0.418015	0.048735	0.0014475
	131	-0.927198	0	1.62322	0.431846	0.0367099	0.000959851
	132	-0.939084	0	1.68838	0.446237	0.00817547	0.000422591
	133	-0.928128	0	1.67355	0.461074	0.0137738	4.44512e-05
	134	-0.943284	0	1.66594	0.476502	0.00729326	0
	135	-0.982377	0	1.68519	0.487453	-0.0302975	0
	136	-0.985938	0	1.74798	0.439107	-0.0741597	0
	137	-0.982943	0	1.76753	0.354961	-0.090159	0
	138	-0.973602	0	1.71026	0.270864	-0.0571909	0
	139	-0.949222	0	1.71658	0.20033	-0.0871991	0
	140	-0.954473	0	1.72326	0.139883	-0.102556	0
	141	-0.987237	0	1.71699	0.0825984	-0.0743916	0
	142	-0.999717	0	1.71101	0.0645234	-0.0598279	0
	143	-1.01106	0	1.72805	0.0706552	-0.0705535	0
	144	-1.02024	0	1.78128	0.0759588	-0.120713	0
	145	-0.971921	0	1.73428	0.0664787	-0.106001	0
	146	-0.981426	0	1.71262	0.0479291	-0.0975836	0
	147	-1.0443	0	1.75077	0.0281229	-0.116298	0
	148	-1.05584	0	1.76325	0.00521579	-0.126776	0
	149	-1.05884	0	1.75149	0.0428321	-0.133952	0
	150	-1.05365	0	1.70661	0.0796086	-0.137589	0
	151	-1.03552	1.59859e-05	1.72423	0.0885432	-0.166408	0
	152	-1.03778	0.000322307	1.74409	0.0807741	-0.182549	0
	153	-1.05921	0.000900253	1.75502	0.0705536	-0.168063	0
	154	-1.06963	0.00148026	1.75512	0.0382325	-0.217029	0
	155	-1.07281	0.00176275	1.73694	0.00953563	-0.245522	0
	156	-1.069	0.00177293	1.69216	0.0539712	-0.220598	0
	157	-1.06897	0.00175897	1.71007	0.0874113	-0.2152	0
	158	-1.05066	0.00145201	1.75085	0.113489	-0.238503	0
	159	-1.01551	0.000876868	1.8151	0.137554	-0.306591	0
	160	-1.01033	0.000297256	1.76272	0.136428	-0.276258	0
	161	-1.01775	9.43685e-06	1.7392	0.120094	-0.261494	0
	162	-1.03722	0	1.78329	0.101973	-0.299677	0
	163	-1.07232	0	1.74633	0.0686123	-0.310112	0
	164	-1.10612	0	1.71724	0.0264558	-0.287242	0
	165	-1.13762	0	1.7162	0.0141991	-0.213416	0
	166	-1.09364	0	1.79231	0.0293908	-0.30545	0
	167	-1.06965	0	1.80524	0.0288935	-0.334583	0
	168	-1.06482	0	1.70431	0.0272436	-0.210916	0
	169	-1.07507	0	1.75575	0.0156844	-0.254091	0
	170	-1.07561	0	1.7583	0.00274788	-0.287257	0
	171	-1.06752	0	1.65219	0.0182861	-0.256113	0
	172	-1.11159	0	1.69838	0.019284	-0.231045	0
	173	-1.11869	0	1.74903	0.0110201	-0.237623	0
	174	-1.09196	0	1.7773	0.00298677	-0.296977	0
	175	-1.13531	0	1.73378	0.000475133	-0.26772	0
	176	-1.14891	0	1.72071	0.00130479	-0.247062	0
	177	-1.13454	0	1.76992	0.00214602	-0.267084	0
	178	-1.11388	0	1.71485	0.00224285	-0.307371	0
	179	-1.11341	0	1.68155	0.00187988	-0.315254	0
	180	-1.13207	0	1.70323	0.0014905	-0.262545	0
	181	-1.15041	0	1.68733	0.00106264	-0.349794	0
	182	-1.15514	0	1.66709	0.000607509	-0.380429	0
	183	-1.14714	0	1.64728	0.000170399	-0.277512	0
	184	-1.14073	0	1.69115	3.61147e-06	-0.235318	0
	185	-1.1334	0	1.71782	0	-0.233473	0
	186	-1.12544	0	1.706	0	-0.287038	0
	187	-1.13344	0	1.70738	0	-0.292882	0
	188	-1.13415	0	1.7132	0	-0.296331	0
	189	-1.12806	0	1.72358	1.97714e-05	-0.308354	0
	190	-1.12925	0	1.69171	0.00031346	-0.30812	0
	191	-1.1296	0	1.69841	0.000763905	-0.305306	0
	192	-1.12948	0	1.77399	0.00120275	-0.301152	0
	193	-1.15129	0	1.73269	0.00137084	-0.296633	0
	194	-1.1839	0	1.67442	0.00137495	-0.293195	0
	195	-1.22535	0	1.61279	0.00135351	-0.29176	0
	196	-1.19056	0	1.69627	0.00106443	-0.300568	0
	197	-1.17074	0	1.69517	0.00060088	-0.291242	0
	198	-1.16527	0	1.52847	0.000150803	-0.248573	0
	199	-1.17656	0	1.54168	3.24181e-06	-0.265118	0
	200	-1.18762	0	1.53392	0	-0.279741	0
	201	-1.19879	0	1.45616	0	-0.273967	0
	202	-1.22874	0	1.4249	0	-0.270521	0
	203	-1.22041	0	1.41345	0	-0.255067	0
	204	-1.17704	0	1.424	0	-0.218094	0
	205	-1.2024	0	1.37764	0	-0.25946	0
	206	-1.23734	0	1.3459	0	-0.293667	0
	207	-1.28021	0	1.3499	2.00661e-05	-0.294026	0
	208	-1.25855	0	1.31361	0.000311097	-0.25313	0
	209	-1.24321	0	1.27307	0.000767483	-0.21847	0
	210	-1.234	0	1.23379	0.00120349	-0.206325	2.15832e-06
	211	-1.23514	0	1.2743	0.00137165	-0.199559	0.000149714
	212	-1.22699	0	1.2904	0.00137495	-0.179186	0.000641644
	213	-1.21071	0	1.25253	0.00135371	-0.133331	0.00118281
	214	-1.25129	0	1.24442	0.00106413	-0.109051	0.00156372
	215	-1.24527	0	1.24541	0.000610124	-0.0879721	0.00160808
	216	-1.19608	0	1.25488	0.000149807	-0.06671	0.00160629
	217	-1.24601	0	1.24004	0.000310877	-0.0543427	0.00145412
	218	-1.27561	0	1.23972	0.000769343	-0.0332378	0.000959163
	219	-1.28593	0	1.26835	0.00154348	0.00554471	0.000421897
	220	-1.28997	0	1.26477	0.00654962	0.0313253	4.49902e-05
	221	-1.30661	0	1.26295	0.0140256	0.0647717	0
	222	-1.33418	0	1.27018	0.0215025	0.115194	0
	223	-1.28727	0	1.25016	0.0266195	0.0800795	0
	224	-1.28191	0	1.23564	0.0303403	0.0587361	0
	225	-1.31492	0	1.23607	0.0324708	0.0829517	0
	226	-1.25917	0	1.25556	0.0145525	0.0994444	0
	227	-1.271	0	1.26661	0.0156872	0.119403	0
	228	-1.34578	0	1.26064	0.0488426	0.147351	0
	229	-1.32643	0	1.30468	0.109917	0.15775	0
	230	-1.31379	0	1.33152	0.187555	0.157011	0
	231	-1.30745	0	1.31998	0.264025	0.141525	0
	232	-1.30107	0	1.3024	0.317771	0.0778221	0
	233	-1.30261	0	1.2927	0.357639	0.035976	0
	234	-1.31143	0	1.29655	0.393101	0.044735	3.57312e-06
	235	-1.31031	0	1.30313	0.388572	0.0757322	0.000408922
	236	-1.30398	0	1.31405	0.359444	0.0919204	0.00165748
	237	-1.29282	0	1.3318	0.328767	0.0766339	0.00303595
	238	-1.28839	0	1.35483	0.291994	0.0924911	0.00439066
	239	-1.29628	0	1.35223	0.251548	0.0915876	0.00569859
	240	-1.3158	0	1.30738	0.212647	0.0533812	0.00700921
	241	-1.33701	2.20496e-06	1.35464	0.198636	0.031837	0.00784847
	242	-1.34109	4.37635e-05	1.37456	0.199695	0.0450645	0.00768253
	243	-1.32943	0.000125212	1.33294	0.204198	0.11442	0.0073747
	244	-1.33368	0.0002178	1.38385	0.247657	0.0895711	0.0067102
	245	-1.32913	0.000527505	1.41166	0.3149	0.0594584	0.00527566
	246	-1.31666	0.00102406	1.38403	0.382123	0.0447535	0.00377827
	247	-1.32969	0.00151779	1.39309	0.430064	0.0594498	0.00775511
	248	-1.32054	0.00171708	1.41129	0.46617	0.0796777	0.0234372
	249	-1.29129	0.00164791	1.43662	0.497944	0.101772	0.04103
	250	-1.32174	0.00155541	1.40122	0.476662	0.102937	0.0528288
	251	-1.33439	0.00125062	1.37908	0.422625	0.139108	0.0526076
	252	-1.3303	0.000748693	1.39037	0.367756	0.24245	0.0506236
	253	-1.338	0.000254425	1.38597	0.306488	0.192107	0.0411306
	254	-1.32503	9.58467e-06	1.3962	0.241522	0.152273	0.0146116
	255	-1.29347	0	1.43459	0.177711	0.174021	0.0144455
	256	-1.31668	0	1.49955	0.128602	0.129444	0.0318453
	257	-1.33236	0	1.50552	0.0888129	0.126399	0.0254714
	258	-1.34141	0	1.41206	0.0499486	0.212415	0.0159268
	259	-1.38382	0	1.45995	0.0266747	0.230651	0.00589387
	260	-1.39874	0	1.48788	0.012981	0.24412	0.00434251
	261	-1.38787	0	1.4551	0.000873213	0.267761	0.0148569
	262	-1.36691	0	1.45206	0.00187238	0.227756	0.0178413
	263	-1.34713	0	1.47656	0.0118086	0.19583	0.00504097
	264	-1.32864	0	1.53895	0.0213879	0.195769	0.0101397
	265	-1.33861	0	1.47625	0.0228752	0.276007	0.0209692
	266	-1.36049	0	1.42289	0.0194617	0.336754	0.0224881
	267	-1.39353	0	1.41025	0.0157974	0.339802	0.0228747
	268	-1.40409	0	1.44942	0.0111128	0.33983	0.0211068
	269	-1.39457	0	1.47699	0.00562685	0.348587	0.0147265
	270	-1.36629	0	1.47629	0.000589063	0.37336	0.00782281
	271	-1.37249	0	1.52152	0.00028778	0.369613	0.00312791
	272	-1.36821	0	1.50732	0.00232316	0.390175	0.00329933
	273	-1.35422	0	1.3905	0.00471919	0.463837	0.00416179
	274	-1.36402	0	1.41384	0.0070395	0.487037	0.00475233
	275	-1.36187	0	1.44597	0.00933063	0.493048	0.00482425
	276	-1.34862	0	1.46435	0.011459	0.482789	0.00482265
	277	-1.35546	0	1.47985	0.0117211	0.521701	0.00466775
	278	-1.36801	0	1.48584	0.0108364	0.526914	0.00418468
	279	-1.38562	0	1.4767	0.00988935	0.460026	0.0036358
	280	-1.36896	0	1.44732	0.00839835	0.538068	0.00318647
	281	-1.36962	0	1.41724	0.00656324	0.591473	0.00291037
	282	-1.38617	0	1.39004	0.00476922	0.564169	0.00266079
	283	-1.37216	0	1.37048	0.00351234	0.472356	0.00248534
	284	-1.37229	0	1.37367	0.00259613	0.417691	0.00248586
	285	-1.38562	0	1.41138	0.00163033	0.444546	0.00250942
	286	-1.39254	0	1.43762	0.000280258	0.433534	0.00251038
	287	-1.39252	0	1.43154	0.00182573	0.440869	0.00246331
	288	-1.38602	0	1.37738	0.00359556	0.490362	0.00240924
	289	-1.38456	0	1.3805	0.00369953	0.463893	0.00236402
	290	-1.37512	0	1.38539	0.00278827	0.417395	0.00233823
	291	-1.35877	0	1.38158	0.000632388	0.356081	0.00231548
	292	-1.38441	0	1.36489	0.0261127	0.34603	0.00238941
	293	-1.39203	0	1.37052	0.0669512	0.32947	0.00266597
	294	-1.383	0	1.41356	0.110411	0.287329	0.00297433
	295	-1.40183	0	1.38944	0.181283	0.331378	0.00303649
	296	-1.40625	0	1.37421	0.267251	0.375727	0.00257098
	297	-1.39724	0	1.38608	0.354439	0.397629	0.00203472
	298	-1.39279	0	1.41485	0.430252	0.334308	0.00149342
	299	-1.4016	0	1.42175	0.499047	0.304024	0.000958462
	300	-1.42263	0	1.39032	0.564719	0.35273	0.000426461

## Sheet: Figure 1-Figure Supplement 1E
		mouse 1 trial 7	mouse 4 trial 4	mouse 5 trial 3
	frame	frame corr	frame corr	frame corr
	31	0.495165	0.591102	0.626434
	32	0.513378	0.61337	0.602412
	33	0.545436	0.563935	0.598309
	34	0.604801	0.57333	0.580597
	35	0.588923	0.532418	0.617276
	36	0.5274	0.513974	0.624759
	37	0.405362	0.475724	0.655116
	38	0.28928	0.372707	0.684449
	39	0.448053	0.361503	0.726389
	40	0.472623	0.417324	0.74884
	41	0.419727	0.498555	0.736936
	42	0.441831	0.535587	0.745521
	43	0.524924	0.453259	0.747174
	44	0.542556	0.489025	0.740647
	45	0.596439	0.506202	0.740794
	46	0.584653	0.517964	0.757127
	47	0.682637	0.539359	0.817397
	48	0.73824	0.496241	0.856422
	49	0.8015	0.535775	0.864873
	50	0.855129	0.589981	0.855959
	51	0.833077	0.532566	0.81303
	52	0.814699	0.555071	0.800351
	53	0.674875	0.507551	0.800699
	54	0.5607	0.506236	0.782679
	55	0.512044	0.552573	0.786502
	56	0.386758	0.569279	0.763217
	57	0.401673	0.612309	0.761523
	58	0.425732	0.5938	0.756928
	59	0.384544	0.535319	0.729123
	60	0.308546	0.481628	0.737847
	61	0.344057	0.451893	0.72437
	62	0.331417	0.411349	0.728621
	63	0.359615	0.393884	0.734997
	64	0.38961	0.352359	0.733242
	65	0.524014	0.376693	0.734431
	66	0.574454	0.395365	0.746007
	67	0.571945	0.413781	0.750721
	68	0.468777	0.427112	0.741533
	69	0.416916	0.500873	0.755222
	70	0.41127	0.509238	0.765727
	71	0.448056	0.522065	0.772377
	72	0.522286	0.533346	0.769622
	73	0.57561	0.555418	0.750619
	74	0.602013	0.577943	0.758774
	75	0.660131	0.586644	0.765078
	76	0.662136	0.574166	0.779972
	77	0.626993	0.56103	0.78901
	78	0.652684	0.568599	0.794031
	79	0.662929	0.564513	0.801272
	80	0.669705	0.539483	0.792749
	81	0.666124	0.576108	0.782686
	82	0.692533	0.60809	0.787215
	83	0.707093	0.59795	0.781914
	84	0.707885	0.612817	0.791101
	85	0.705548	0.57505	0.806921
	86	0.727105	0.590272	0.814816
	87	0.791221	0.61164	0.823833
	88	0.775119	0.596429	0.810901
	89	0.812447	0.590104	0.807107
	90	0.801307	0.558146	0.788282
	91	0.74632	0.508436	0.743037
	92	0.742851	0.502613	0.694388
	93	0.727681	0.496445	0.649041
	94	0.68782	0.510923	0.628825
	95	0.607442	0.533183	0.617981
	96	0.577603	0.500942	0.610525
	97	0.440342	0.525282	0.585526
	98	0.476582	0.534961	0.585814
	99	0.628233	0.564197	0.586722
	100	0.723921	0.550024	0.600115
	101	0.776274	0.588385	0.602091
	102	0.746671	0.590619	0.614657
	103	0.678957	0.579736	0.646429
	104	0.678703	0.587794	0.644587
	105	0.68749	0.695885	0.656589
	106	0.694146	0.136858	0.668978
	107	0.661069	0.166144	0.682206
	108	0.646337	0.126155	0.691894
	109	0.609175	0.231806	0.711261
	110	0.534765	0.264609	0.720919
	111	0.510085	0.304256	0.732449
	112	0.466578	0.318423	0.735797
	113	0.49474	0.454789	0.734443
	114	0.48381	0.485568	0.72955
	115	0.448785	0.488896	0.722259
	116	0.52345	0.367772	0.711874
	117	0.633005	0.281551	0.716932
	118	0.704867	0.132069	0.695514
	119	0.736767	-0.0888181	0.683592
	120	0.749789	-0.059908	0.660024
	121	0.73866	0.00277907	0.672272
	122	0.709237	0.00173491	0.690316
	123	0.658494	0.0765042	0.741649
	124	0.618636	0.101723	0.760238
	125	0.571623	0.368914	0.791354
	126	0.56398	0.45383	0.793413
	127	0.553931	0.438422	0.775044
	128	0.583517	-0.125278	0.764553
	129	0.627845	-0.484791	0.757591
	130	0.648257	0.0991285	0.739767
	131	0.630438	0.41463	0.689571
	132	0.6425	0.335767	0.670625
	133	0.62775	0.513044	0.661457
	134	0.635014	0.151178	0.670216
	135	0.648931	-0.0137404	0.672669
	136	0.668379	-0.151091	0.664976
	137	0.684704	-0.0390408	0.683051
	138	0.686459	0.361792	0.684155
	139	0.68724	0.474838	0.700736
	140	0.660122	0.672456	0.719772
	141	0.614391	0.789986	0.747467
	142	0.519909	0.806099	0.746745
	143	0.484217	0.895222	0.753149
	144	0.403275	0.880903	0.737388
	145	0.370985	0.77524	0.718121
	146	0.301282	0.678771	0.707265
	147	0.240435	0.702073	0.720491
	148	0.262354	0.637729	0.720878
	149	0.238997	0.715594	0.702906
	150	0.292798	0.794087	0.704836
	151	0.347334	0.805535	0.701179
	152	0.3885	0.81257	0.699287
	153	0.455447	0.814226	0.72705
	154	0.466223	0.809688	0.731815
	155	0.511261	0.805856	0.726606
	156	0.561966	0.819153	0.720036
	157	0.546278	0.819339	0.727681
	158	0.609466	0.826238	0.730428
	159	0.651439	0.825689	0.724139
	160	0.671693	0.827144	0.725292
	161	0.656578	0.825184	0.704362
	162	0.584201	0.818966	0.692789
	163	0.433968	0.814477	0.679728
	164	0.281058	0.800029	0.654686
	165	0.397991	0.779402	0.606839
	166	0.468722	0.774173	0.562445
	167	0.524846	0.766137	0.587072
	168	0.597665	0.741681	0.606186
	169	0.614592	0.723464	0.634837
	170	0.638536	0.710468	0.676935
	171	0.590398	0.696696	0.697018
	172	0.583072	0.700871	0.725795
	173	0.568375	0.703056	0.747873
	174	0.595449	0.703278	0.748489
	175	0.618085	0.712714	0.753508
	176	0.636021	0.72563	0.722875
	177	0.620519	0.723664	0.718945
	178	0.610233	0.731051	0.687178
	179	0.601412	0.709027	0.646301
	180	0.594081	0.69459	0.618782
	181	0.590882	0.689762	0.591839
	182	0.597322	0.683953	0.593679
	183	0.601766	0.671397	0.577161
	184	0.604693	0.64636	0.598052
	185	0.59485	0.616552	0.610638
	186	0.583771	0.601922	0.640114
	187	0.581972	0.637802	0.632532
	188	0.591305	0.65032	0.649076
	189	0.571195	0.641754	0.689674
	190	0.574163	0.711303	0.676544
	191	0.579245	0.706072	0.445666
	192	0.580078	0.739946	0.461766
	193	0.604581	0.732807	0.461926
	194	0.626871	0.744839	0.541693
	195	0.589985	0.739648	0.543599
	196	0.597021	0.738424	0.583979
	197	0.599595	0.730452	0.574996
	198	0.602358	0.730844	0.587007
	199	0.619141	0.712175	0.596683
	200	0.593771	0.713856	0.580251
	201	0.56671	0.708168	0.59426
	202	0.528458	0.730664	0.588139
	203	0.482484	0.725523	0.548606
	204	0.51172	0.744466	0.537275
	205	0.543581	0.737819	0.558459
	206	0.539179	0.754338	0.561783
	207	0.553442	0.757474	0.582647
	208	0.543004	0.763165	0.57482
	209	0.5347	0.744181	0.590964
	210	0.561314	0.743678	0.584879
	211	0.54557	0.742474	0.542506
	212	0.571171	0.742586	0.522069
	213	0.548957	0.753698	0.510629
	214	0.549402	0.745392	0.479239
	215	0.510541	0.733318	0.475871
	216	0.488242	0.712571	0.468341
	217	0.439337	0.681958	0.472555
	218	0.404934	0.66339	0.459096
	219	0.336736	0.658338	0.434373
	220	0.249121	0.647015	0.432283
	221	0.222174	0.66338	0.513307
	222	0.232202	0.670233	0.528746
	223	0.230086	0.679831	0.541981
	224	0.218087	0.668135	0.507105
	225	0.193981	0.65712	0.491954
	226	0.204721	0.637134	0.437301
	227	0.179108	0.6706	0.435295
	228	0.227827	0.655878	0.415697
	229	0.225045	0.65672	0.498969
	230	0.256467	0.661644	0.548786
	231	0.278748	0.669286	0.614287
	232	0.337166	0.685714	0.639571
	233	0.391412	0.686329	0.658144
	234	0.407489	0.684546	0.667048
	235	0.402111	0.674625	0.659188
	236	0.385414	0.67683	0.643066
	237	0.336366	0.653629	0.621727
	238	0.332281	0.630709	0.603178
	239	0.285061	0.645727	0.608777
	240	0.282998	0.64934	0.628177
	241	0.270019	0.640431	0.641696
	242	0.282501	0.649114	0.658066
	243	0.285443	0.63522	0.655225
	244	0.296108	0.640218	0.641755
	245	0.32691	0.665137	0.636695
	246	0.331468	0.655635	0.609415
	247	0.389493	0.651336	0.594475
	248	0.404296	0.641038	0.608713
	249	0.41525	0.62814	0.674971
	250	0.403294	0.613509	0.672498
	251	0.382207	0.609302	0.684912
	252	0.313943	0.597964	0.645691
	253	0.210037	0.612822	0.635597
	254	0.121929	0.623017	0.578334
	255	0.0505486	0.647608	0.5617
	256	0.0168536	0.665144	0.513746
	257	6.54707e-05	0.661722	0.533036
	258	0.00258478	0.677873	0.511717
	259	0.0108497	0.67546	0.516259
	260	0.0456085	0.684648	0.489555
	261	0.111095	0.71947	0.494282
	262	0.200745	0.714738	0.496318
	263	0.300726	0.763123	0.499627
	264	0.397528	0.761253	0.46208
	265	0.429261	0.675354	0.47494
	266	0.467806	0.428357	0.444813
	267	0.478833	0.568355	0.444531
	268	0.519607	0.574467	0.43281
	269	0.54717	0.578079	0.468813
	270	0.55873	0.59529	0.468101
	271	0.563013	0.710976	0.482619
	272	0.56033	0.723316	0.477565
	273	0.54485	0.754449	0.476812
	274	0.544204	0.72168	0.4893
	275	0.515897	0.735354	0.48829
	276	0.516871	0.722623	0.499096
	277	0.497687	0.719386	0.496672
	278	0.489067	0.722919	0.507702
	279	0.489383	0.719783	0.519514
	280	0.506305	0.73577	0.521599
	281	0.519665	0.744273	0.52252
	282	0.563836	0.722537	0.532885
	283	0.568948	0.723979	0.499236
	284	0.593225	0.687434	0.520069
	285	0.56791	0.679208	0.485261
	286	0.570919	0.673994	0.502979
	287	0.566923	0.672805	0.516711
	288	0.579312	0.70095	0.510601
	289	0.574132	0.721594	0.534644
	290	0.587717	0.731264	0.526852
	291	0.574589	0.76431	0.522861
	292	0.574601	0.752851	0.512623
	293	0.565561	0.773258	0.498062
	294	0.584479	0.768812	0.537419
	295	0.578913	0.783954	0.562526
	296	0.60863	0.778401	0.55628
	297	0.611653	0.780234	0.557435
	298	0.612732	0.776096	0.538762
	299	0.613289	0.786345	0.555062
	300	0.589027	0.79749	0.533602
