# Supplementary material for: Movie reconstruction from mouse visual cortex activity
Source: eLife. 2026 Mar 10;14:RP105081. doi: 10.7554/eLife.105081 (PMC12975128; doi:10.7554/eLife.105081)
Supplement: Figure 6—source data 1. [file elife-105081-fig6-data1.xlsx]

## Sheet: Figure 6A
	frame	frame correlation
	31	0.495165
	32	0.513378
	33	0.545436
	34	0.604801
	35	0.588923
	36	0.5274
	37	0.405362
	38	0.28928
	39	0.448053
	40	0.472623
	41	0.419727
	42	0.441831
	43	0.524924
	44	0.542556
	45	0.596439
	46	0.584653
	47	0.682637
	48	0.73824
	49	0.8015
	50	0.855129
	51	0.833077
	52	0.814699
	53	0.674875
	54	0.5607
	55	0.512044
	56	0.386758
	57	0.401673
	58	0.425732
	59	0.384544
	60	0.308546
	61	0.344057
	62	0.331417
	63	0.359615
	64	0.38961
	65	0.524014
	66	0.574454
	67	0.571945
	68	0.468777
	69	0.416916
	70	0.41127
	71	0.448056
	72	0.522286
	73	0.57561
	74	0.602013
	75	0.660131
	76	0.662136
	77	0.626993
	78	0.652684
	79	0.662929
	80	0.669705
	81	0.666124
	82	0.692533
	83	0.707093
	84	0.707885
	85	0.705548
	86	0.727105
	87	0.791221
	88	0.775119
	89	0.812447
	90	0.801307
	91	0.74632
	92	0.742851
	93	0.727681
	94	0.68782
	95	0.607442
	96	0.577603
	97	0.440342
	98	0.476582
	99	0.628233
	100	0.723921
	101	0.776274
	102	0.746671
	103	0.678957
	104	0.678703
	105	0.68749
	106	0.694146
	107	0.661069
	108	0.646337
	109	0.609175
	110	0.534765
	111	0.510085
	112	0.466578
	113	0.49474
	114	0.48381
	115	0.448785
	116	0.52345
	117	0.633005
	118	0.704867
	119	0.736767
	120	0.749789
	121	0.73866
	122	0.709237
	123	0.658494
	124	0.618636
	125	0.571623
	126	0.56398
	127	0.553931
	128	0.583517
	129	0.627845
	130	0.648257
	131	0.630438
	132	0.6425
	133	0.62775
	134	0.635014
	135	0.648931
	136	0.668379
	137	0.684704
	138	0.686459
	139	0.68724
	140	0.660122
	141	0.614391
	142	0.519909
	143	0.484217
	144	0.403275
	145	0.370985
	146	0.301282
	147	0.240435
	148	0.262354
	149	0.238997
	150	0.292798
	151	0.347334
	152	0.3885
	153	0.455447
	154	0.466223
	155	0.511261
	156	0.561966
	157	0.546278
	158	0.609466
	159	0.651439
	160	0.671693
	161	0.656578
	162	0.584201
	163	0.433968
	164	0.281058
	165	0.397991
	166	0.468722
	167	0.524846
	168	0.597665
	169	0.614592
	170	0.638536
	171	0.590398
	172	0.583072
	173	0.568375
	174	0.595449
	175	0.618085
	176	0.636021
	177	0.620519
	178	0.610233
	179	0.601412
	180	0.594081
	181	0.590882
	182	0.597322
	183	0.601766
	184	0.604693
	185	0.59485
	186	0.583771
	187	0.581972
	188	0.591305
	189	0.571195
	190	0.574163
	191	0.579245
	192	0.580078
	193	0.604581
	194	0.626871
	195	0.589985
	196	0.597021
	197	0.599595
	198	0.602358
	199	0.619141
	200	0.593771
	201	0.56671
	202	0.528458
	203	0.482484
	204	0.51172
	205	0.543581
	206	0.539179
	207	0.553442
	208	0.543004
	209	0.5347
	210	0.561314
	211	0.54557
	212	0.571171
	213	0.548957
	214	0.549402
	215	0.510541
	216	0.488242
	217	0.439337
	218	0.404934
	219	0.336736
	220	0.249121
	221	0.222174
	222	0.232202
	223	0.230086
	224	0.218087
	225	0.193981
	226	0.204721
	227	0.179108
	228	0.227827
	229	0.225045
	230	0.256467
	231	0.278748
	232	0.337166
	233	0.391412
	234	0.407489
	235	0.402111
	236	0.385414
	237	0.336366
	238	0.332281
	239	0.285061
	240	0.282998
	241	0.270019
	242	0.282501
	243	0.285443
	244	0.296108
	245	0.32691
	246	0.331468
	247	0.389493
	248	0.404296
	249	0.41525
	250	0.403294
	251	0.382207
	252	0.313943
	253	0.210037
	254	0.121929
	255	0.0505486
	256	0.0168536
	257	6.54707e-05
	258	0.00258478
	259	0.0108497
	260	0.0456085
	261	0.111095
	262	0.200745
	263	0.300726
	264	0.397528
	265	0.429261
	266	0.467806
	267	0.478833
	268	0.519607
	269	0.54717
	270	0.55873
	271	0.563013
	272	0.56033
	273	0.54485
	274	0.544204
	275	0.515897
	276	0.516871
	277	0.497687
	278	0.489067
	279	0.489383
	280	0.506305
	281	0.519665
	282	0.563836
	283	0.568948
	284	0.593225
	285	0.56791
	286	0.570919
	287	0.566923
	288	0.579312
	289	0.574132
	290	0.587717
	291	0.574589
	292	0.574601
	293	0.565561
	294	0.584479
	295	0.578913
	296	0.60863
	297	0.611653
	298	0.612732
	299	0.613289
	300	0.589027

## Sheet: Figure 6C
	frame	activity correlation difference
	31	0.246994
	32	0.206085
	33	0.170104
	34	0.158496
	35	0.111615
	36	0.0678962
	37	0.0493236
	38	0.0544611
	39	0.0513268
	40	0.0490525
	41	0.0510707
	42	0.0500255
	43	0.0492944
	44	0.0632772
	45	0.0589971
	46	0.070692
	47	0.0798792
	48	0.0930839
	49	0.0866432
	50	0.0686639
	51	0.0466714
	52	0.0178286
	53	0.00474011
	54	0.00233676
	55	0.00768369
	56	0.000746103
	57	-0.00836159
	58	-0.0246137
	59	-0.0260923
	60	-0.00772217
	61	0.0144152
	62	0.0482435
	63	0.065038
	64	0.0679408
	65	0.0652257
	66	0.062066
	67	0.058764
	68	0.059114
	69	0.0675087
	70	0.0675062
	71	0.0483309
	72	0.0291937
	73	0.0231739
	74	0.0400983
	75	0.0434486
	76	0.0421293
	77	0.0349163
	78	0.0409858
	79	0.0411512
	80	0.0454767
	81	0.034486
	82	0.0221826
	83	0.00859302
	84	-0.000300858
	85	-0.00404994
	86	-0.010222
	87	-0.0168547
	88	-0.0259841
	89	-0.0226929
	90	0.00352353
	91	0.0463359
	92	0.0669602
	93	0.0604634
	94	0.0458938
	95	0.0279692
	96	0.0388357
	97	0.0381587
	98	0.0321564
	99	-0.0247889
	100	-0.0832349
	101	-0.0916734
	102	-0.0752327
	103	-0.0507726
	104	-0.00843124
	105	0.0267319
	106	0.0476373
	107	0.0409766
	108	0.0361168
	109	0.0272437
	110	0.0319062
	111	0.0327678
	112	0.0322689
	113	0.0480067
	114	0.0824136
	115	0.125723
	116	0.167604
	117	0.167822
	118	0.156022
	119	0.131877
	120	0.112522
	121	0.0987643
	122	0.102053
	123	0.109383
	124	0.111001
	125	0.0907631
	126	0.0843976
	127	0.0819022
	128	0.102507
	129	0.118651
	130	0.131685
	131	0.140919
	132	0.141665
	133	0.118866
	134	0.108322
	135	0.0941607
	136	0.0850377
	137	0.081735
	138	0.0778845
	139	0.0702617
	140	0.0581961
	141	0.0533643
	142	0.0464112
	143	0.0297034
	144	0.019949
	145	0.0133678
	146	0.037562
	147	0.079585
	148	0.0886083
	149	0.0868382
	150	0.068162
	151	0.0523424
	152	0.0439987
	153	0.0703473
	154	0.086351
	155	0.121194
	156	0.126772
	157	0.144941
	158	0.113591
	159	0.0729368
	160	0.0443197
	161	0.0499455
	162	0.0752925
	163	0.114316
	164	0.168671
	165	0.260471
	166	0.293909
	167	0.294885
	168	0.284528
	169	0.217823
	170	0.102808
	171	-0.015719
	172	0.0162685
	173	0.102768
	174	0.157412
	175	0.18773
	176	0.210381
	177	0.23061
	178	0.243595
	179	0.242013
	180	0.236585
	181	0.233464
	182	0.223667
	183	0.196311
	184	0.160258
	185	0.126852
	186	0.09891
	187	0.148911
	188	0.22439
	189	0.27656
	190	0.285494
	191	0.30743
	192	0.292535
	193	0.269041
	194	0.262163
	195	0.263057
	196	0.277632
	197	0.251978
	198	0.23124
	199	0.248574
	200	0.24492
	201	0.233017
	202	0.256705
	203	0.264379
	204	0.248208
	205	0.223524
	206	0.22581
	207	0.233861
	208	0.236964
	209	0.240606
	210	0.261442
	211	0.262464
	212	0.232977
	213	0.21558
	214	0.211407
	215	0.198712
	216	0.171403
	217	0.163644
	218	0.151251
	219	0.145103
	220	0.14742
	221	0.17853
	222	0.222388
	223	0.229071
	224	0.223853
	225	0.234347
	226	0.234616
	227	0.224744
	228	0.21439
	229	0.212275
	230	0.202505
	231	0.217682
	232	0.226287
	233	0.22501
	234	0.204137
	235	0.165092
	236	0.145575
	237	0.128501
	238	0.0970637
	239	0.0789439
	240	0.107936
	241	0.128019
	242	0.135742
	243	0.141735
	244	0.151849
	245	0.15055
	246	0.147948
	247	0.149732
	248	0.161008
	249	0.137741
	250	0.12127
	251	0.108567
	252	0.117164
	253	0.109575
	254	0.117389
	255	0.126484
	256	0.180543
	257	0.23627
	258	0.315958
	259	0.370465
	260	0.376039
	261	0.359418
	262	0.34496
	263	0.317294
	264	0.26444
	265	0.173779
	266	0.12085
	267	0.0786639
	268	0.0631496
	269	0.0607683
	270	0.0603746
	271	0.0661993
	272	0.0723294
	273	0.0909831
	274	0.116273
	275	0.138202
	276	0.145233
	277	0.159102
	278	0.155446
	279	0.150037
	280	0.128394
	281	0.110227
	282	0.0907613
	283	0.084382
	284	0.0821365
	285	0.112936
	286	0.142262
	287	0.160463
	288	0.160997
	289	0.147859
	290	0.147234
	291	0.147372
	292	0.156373
	293	0.173582
	294	0.189921
	295	0.19607
	296	0.196567
	297	0.198363
	298	0.203598
	299	0.216657
	300	0.227727
